# Supplementary material
Source: publisher figshare collection journal article supplement (https://gsajournals.figshare.com/ndownloader/files/32400473)
Supplement: Supplementary file 1 [file 32400473]

**Supplementary Table 2.** Plasmids

| Plasmid | Description |
| --- | --- |
| pCS2+ | Empty expression vector under a CMV promoter |
| pCS2+-3xHA | Cloning of the 3xHA tag sequence in pCS2+ sequence |
| pCS2+-3xFlag | Cloning of the 3xFlag tag sequence in pCS2+ sequence |
| pCS2+-HA:mCherry | Cloning of a HA:mCherry tag in pCS2+ plasmid (gift from M. Gessler (University of Wuerzburg)) |
| pCS2+-SdY-I183N | SdY-N183 CDS cloned into a pCS2+ backbone from pFLAG:SdY:N183 plasmid |
| pCS2+-FLAG:SdY-I183N | FLAG:SdY fusion under the control of a CMV promoter, SdY-I183N CDS cloned into the pCS2+ backbone. |
| pCS2+-3xFlag :SdY-I183N | 3xFLAG:SdY-I183N fusion under the control of a CMV promoter, SdY-I183N CDS cloned into the pCS2+-3xFLAG backbone. |
| pCS2+-HA :mCherry:Foxl2b2 | HA:mCherry:Foxl2b2 fusion under the control of a CMV promoter, Foxl2b CDS cloned into a pCS2+-HA:mCherry backbone. |
| pCS2+-Ol-Foxl2 | Cloning of Oryzias latipes Foxl2 CDS from pCS2+-OlaFoxl2:FLAG |
| pcDNA3.1-OlaNr5a1 | Gene synthesis of medaka Nr5a1 by between the EcoR1-Xho1 restriction enzyme site ( genescript) |
| pGL3 basic | Vector backbone containing a cDNA modified firefly luciferase (luc+) |
| pGL3-Ol-cyp19a1a | Firefly luciferase under the control of two kb upstream the transcription start site of Ol-Cyp19a1a |
| pminiTK-Renilla | Renilla luciferase under the control of a mini-thymidine Kinase promoter |
